# Supplementary material for: Influence of organic solvent on optical and structural properties of ultra-small silicon dots synthesized by UV laser ablation in liquid
Source: Royal Society of Chemistry journal article supplement (doi:10.1039/c2cp42195j), 2012-01-01

Cite this: DOI: 10.1039/c0xx00000x

www.rsc.org/xxxxxx

## Supporting information

### Influence of organic solvent on optical and structural properties of ultra-small silicon dot synthesized by UV laser ablation in liquid

Romuald Intartaglia,\*<sup>a</sup> Komal Bagga,<sup>a</sup> Alessandro Genovese,<sup>b</sup> Athanassia Athanassiou,<sup>a,c</sup> Roberto Cingolani,<sup>a</sup> Alberto Diaspro,<sup>a</sup> and Fernando Brandi<sup>a</sup>

Received (in XXX, XXX) Xth XXXXXXXXXX 20XX, Accepted Xth XXXXXXXXXX 20XX

DOI: 10.1039/b000000x

10 **Fig. 1S** A schematic diagram of the experimental setup of (a) laser ablation of Si target in solvent and (b) laser irradiation of solvent without target. In the experimental conditions shown in (b), no damage of the cuvette and/or plasma plume formation is observed during and after laser processing.

15

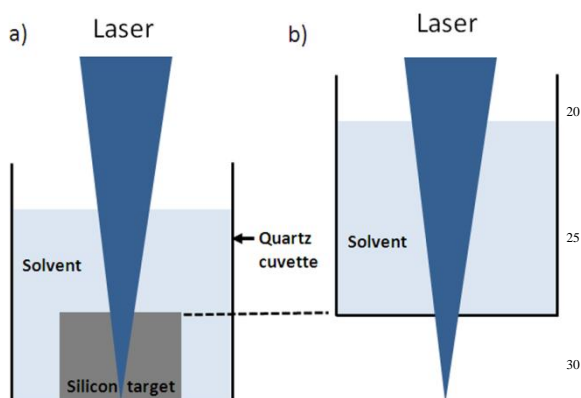

35 **Fig. 2S** TEM image of the carbon byproduct generated by UV irradiation of toluene solvent.

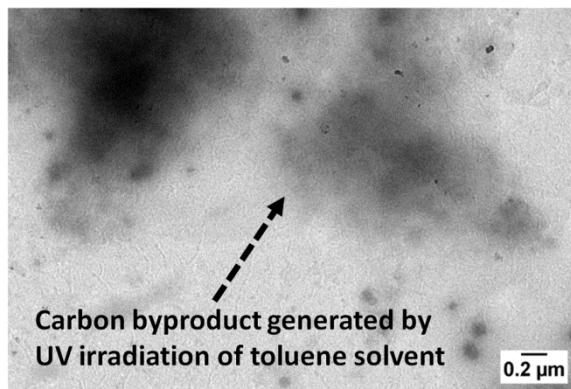

Supplement: c2cp42195j.pdf [file c2cp42195j.pdf]
